# Supplementary material
Source: ML conference proceedings conference paper supplement (https://openaccess.thecvf.com/content/cvpr_2015/html/Ghanem_Robust_Manhattan_Frame_2015_CVPR_paper.html)
Supplement: Supplementary file 1 [file Ghanem_Robust_Manhattan_Frame_2015_CVPR_supplemental.zip]

Archive with 2 entries (2 files):
- 0054-supp.pdf
- video.mp4
